# Supplementary material for: Disrupting glutamine metabolic pathways to sensitize gemcitabine-resistant pancreatic cancer
Source: PubMed Central journal article supplement (PMC5554139; doi:10.1038/s41598-017-08436-6), 2017-08-11
Supplement: 41598_2017_8436_MOESM1_ESM.pdf [file 41598_2017_8436_MOESM1_ESM.pdf]

# **Disrupting glutamine metabolic pathways to sensitize gemcitabine-resistant pancreatic cancer**

Ru Chen<sup>1\*</sup>, Lisa A Lai<sup>1</sup>, Yumi Sullivan<sup>1</sup>, Melissa Wong<sup>1</sup>, Lei Wang<sup>1</sup>, Jonah Riddell<sup>2</sup>, Linda Jung<sup>2</sup>, Venu G. Pillarisetty<sup>3</sup>, Teresa A. Brentnall<sup>1</sup>, Sheng Pan<sup>1</sup> \*

<sup>1</sup>Department of Medicine, University of Washington, Seattle, WA 98195, USA

<sup>2</sup>Cell Signaling Technology, Inc., Danvers, MA 01923

<sup>3</sup>Department of Surgery, University of Washington, Seattle, WA 98195, USA

Supplemental Figure 1. Comparison of GEM viability: GEM-R MiaPaCa, GEM-R Panc, MiaPaCa, Panc, HPDE and CAF.

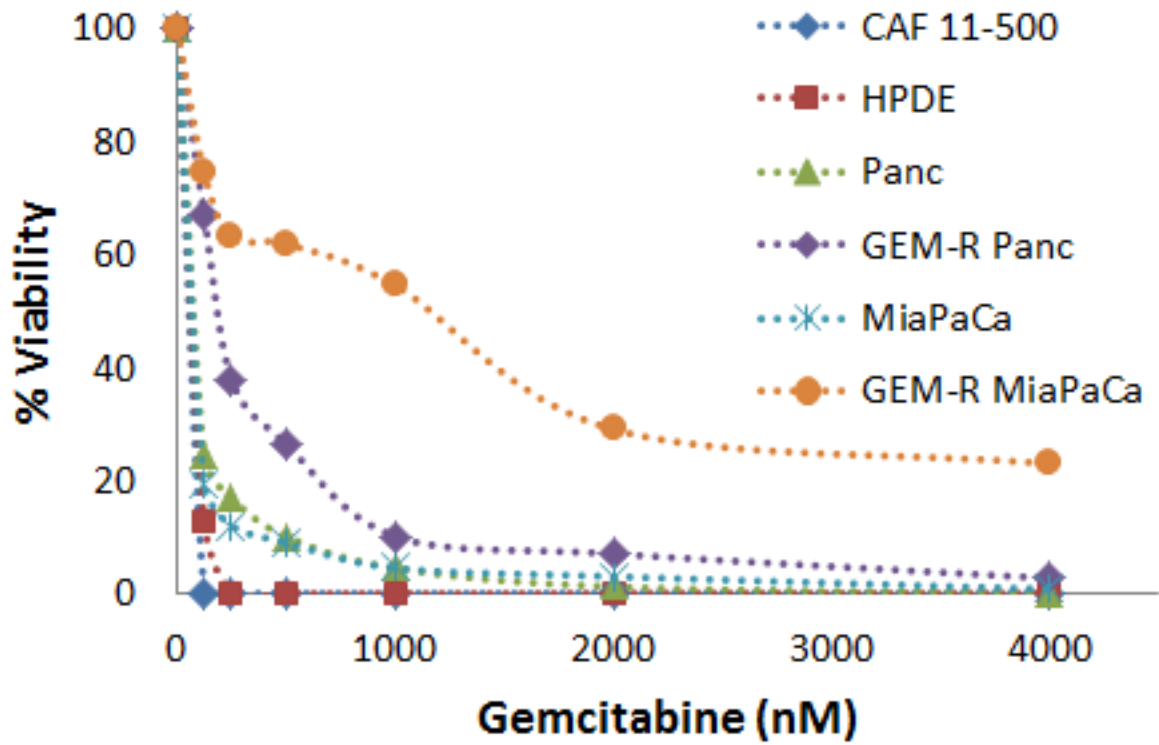

Supplemental Figure 2. Cell proliferation plots normalized to untreated cells.

a. GEM-R MiaPaCa proliferation

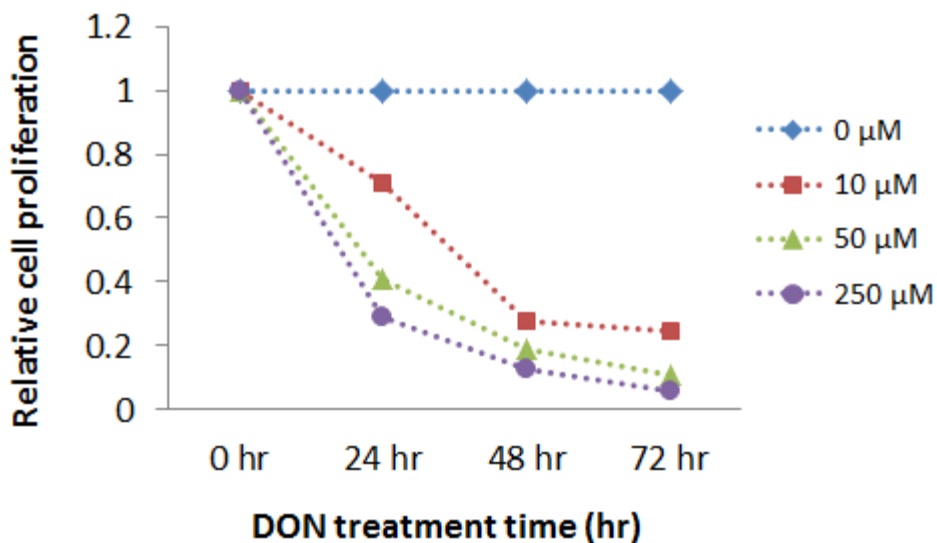

b. GEM-R HPAF proliferation

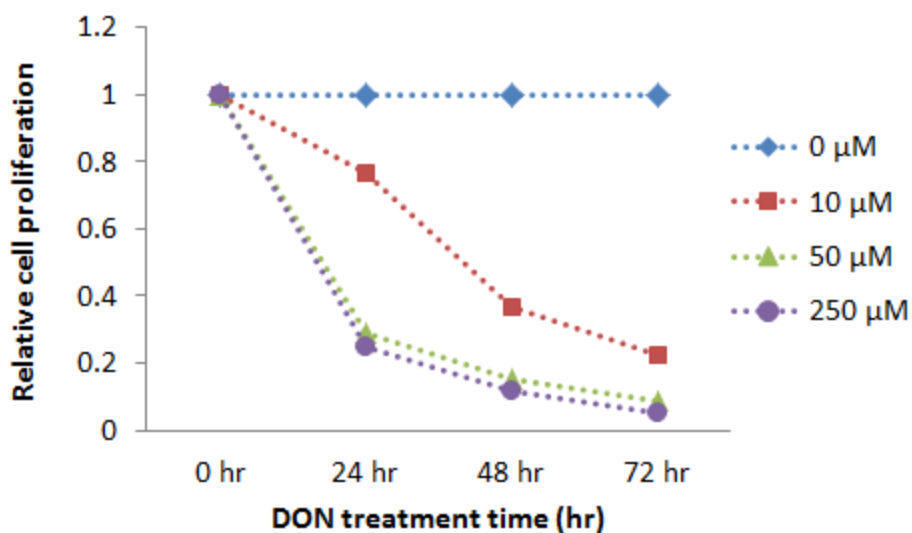

Supplemental Figure 3. Multiplex bead based analysis - Graphs illustrate fluorescence intensity as a function of bead size. Squares reflect gating for individual beads. Bead 1: phospho-pRAS40; bead 2: phospho-Akt; bead 3: phospho-S6; bead 4: phospho-p44/p42 MAPK.

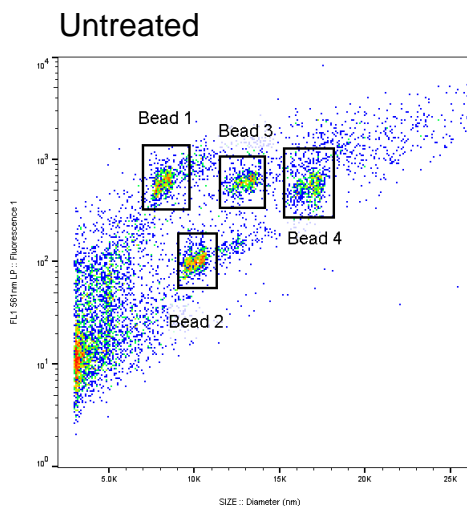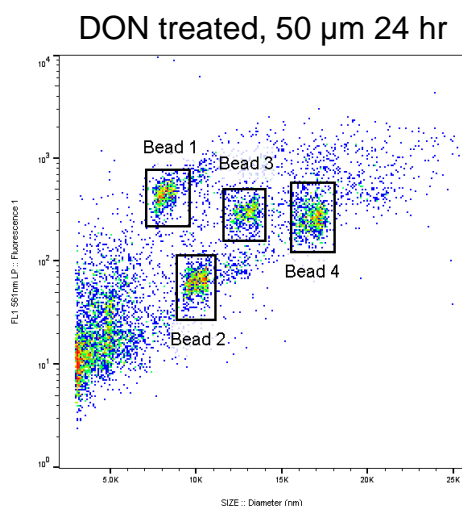

## Supplemental Table 1. Identification of top twenty five exosome markers

| Name     | Spectral count |           |
|----------|----------------|-----------|
|          | GEM-R          | GEM-R DON |
| HSPA8    | 45             | 45        |
| CD9      | 3              | 4         |
| GAPDH    | 115            | 100       |
| ACTB     | 98             | 89        |
| CD63     | 0              | 0         |
| CD81     | 2              | 2         |
| ANXA2    | 34             | 31        |
| ENO1     | 33             | 34        |
| HSP90AA1 | 67             | 55        |
| EEF1A1   | 63             | 50        |
| PKM2     | --             | --        |
| YWHAE    | 15             | 9         |
| SDCBP    | 6              | 3         |
| PDCD6IP  | 11             | 14        |
| ALB      | 51             | 38        |
| YWHAZ    | 9              | 7         |
| EEF2     | 99             | 97        |
| ACTG1    | --             | --        |
| LDHA     | 15             | 16        |
| HSP90AB1 | 24             | 23        |
| ALDOA    | 24             | 20        |
| MSN      | 19             | 7         |
| ANXA5    | 9              | 12        |
| PGK1     | 34             | 34        |
| CFL1     | 11             | 5         |

Supplemental Table 2. EGF-like domain proteins significantly enriched in the exosomes secreted from GEM-R MiaPaCa cells treated with DON

| Term                                          | PValue   | Genes                                                                                                                                                                                            | Fold Enrichment | Bonferroni | Benjamini | FDR      |
|-----------------------------------------------|----------|--------------------------------------------------------------------------------------------------------------------------------------------------------------------------------------------------|-----------------|------------|-----------|----------|
| IPR000742:Epidermal growth factor-like domain | 3.05E-11 | VASN, MATN2, TMEFF2, PEAR1, ATRAID, CD248, ATRN, F7, SCARF1, SLIT2, SCARF2, SLIT3, MUC4, HMCN2, LAMA1, NOTCH1, EYS, FAT3, STAB1, FAT4, FBLN2, TENM2, FAT1, TENM3, HEG1, LRP8, LAMC2, MEGF6, LRP5 | 4.65            | 3.22E-08   | 3.22E-08  | 4.85E-08 |
